# Supplementary material for: Modulation of Expression of PVYNTN RNA-Dependent RNA Polymerase (NIb) and Heat Shock Cognate Host Protein HSC70 in Susceptible and Hypersensitive Potato Cultivars
Source: MDPI journal article supplement (doi:10.3390/vaccines9111254), 2021-10-29
Supplement: s1 [file s1]

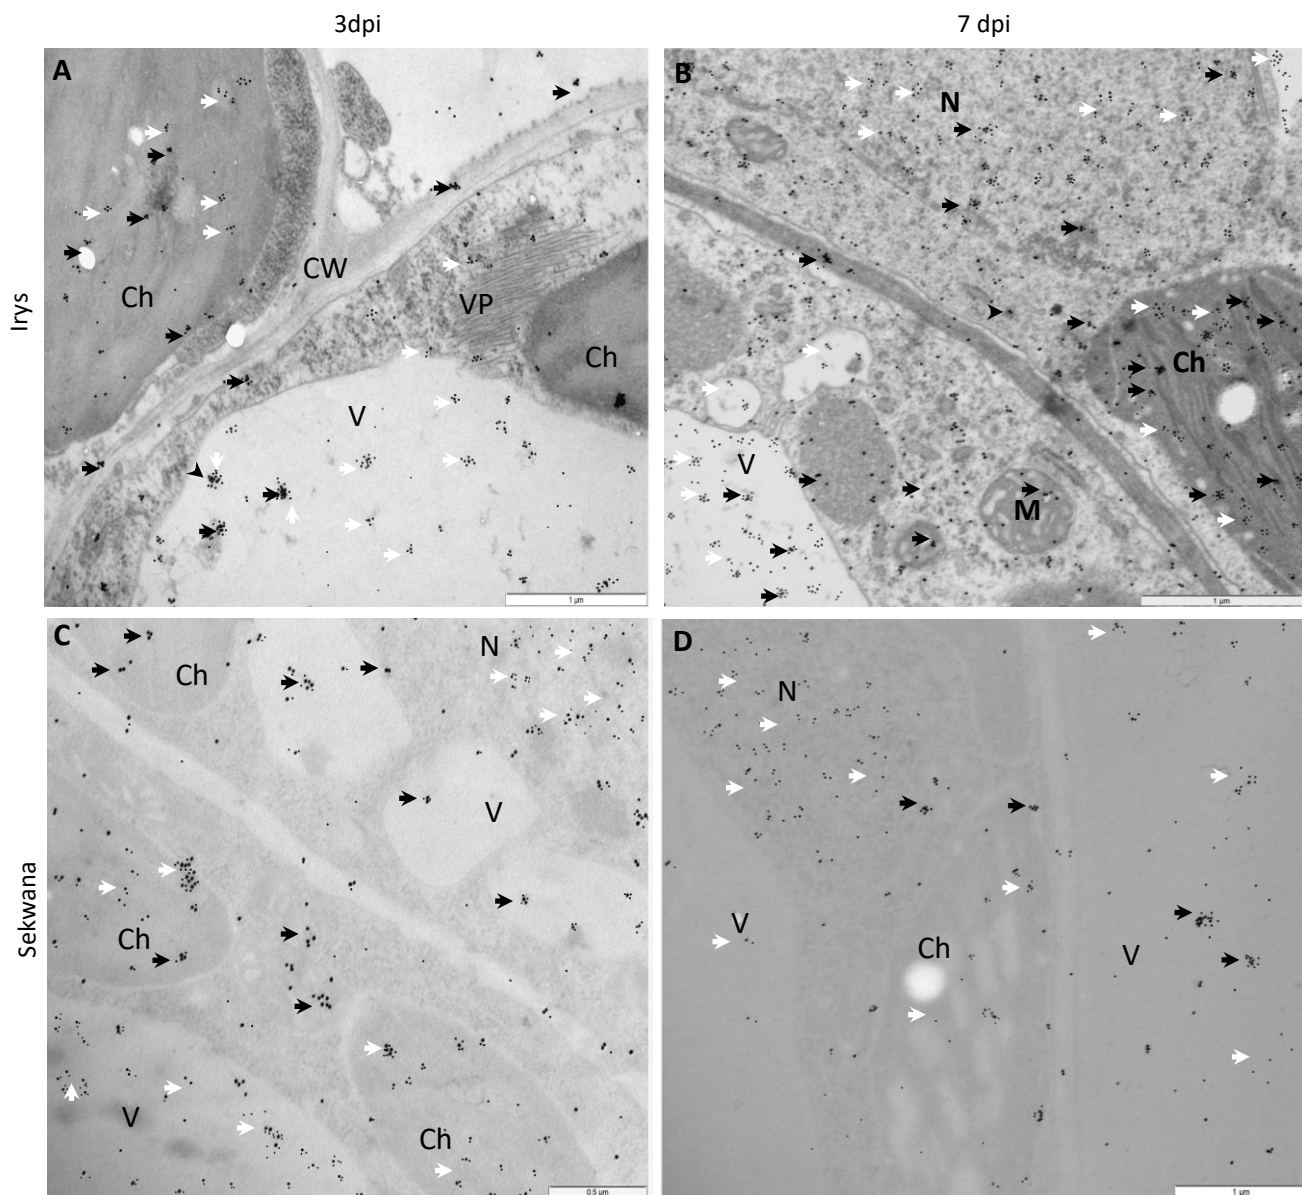

**Figure S1. Double immunogold labelling of PVY-NIb (black arrowhead) and HSC70 (white arrowhead) in susceptible (A-B) and resistance (C-D) PVY<sup>NTN</sup>-potato interactions. (A) PVY-NIb with HSC70 deposition in chloroplast (Ch) and vacuole (V) in mesophyll cells. Virus particles (VP) present in cytoplasm. Scale bar 1  $\mu$ m. (B) Colocalisation NIb with HSC70 in nucleus (N), inside chloroplast (Ch) and vacuoles (V) in spongy mesophyll cells during susceptible interaction. Scale bar 1  $\mu$ m. (C) Colocalisation PVY-NIb with HSC70 in nucleus (N), chloroplast (Ch) and (vacuoles) in palisade mesophyll cell during hypersensitive response. Scale bar 0.5  $\mu$ m. (D) Colocalisation NIb and HSC70 in nucleus (N) and vacuole (V) in phloem parenchyma cell. Scale bar 1  $\mu$ m.**

**Table S1.** Quantification of preferential double-immunogold localization of Nlb and Hsc 70 in  $2 \times 2$  contingency table from GraphPad Software. Quantification of double-immunolocalization parameters in: PVY<sup>NTN</sup> inoculated cv Irys at 3 dpi (A) and 7 dpi and also PVY NTN inoculated cv Sekwana at 3 dpi (C) and 7 dpi (D). Two-tailed  $p$  value ( $p$ ) for cell segments analyses was less than 0.0001. OR—odds ratio, Nlb<sub>g18</sub><sup>+</sup>—presence of 18 nm gold particles associated with presence of Nlb epitope, Nlb<sub>g18</sub><sup>−</sup>—absence of 18 nm gold particles associated with presence of Nlb epitope, HSC 70<sub>g10</sub><sup>+</sup>—presence of 10 nm gold particles associated with presence of HSC 70 epitope, HSC 70<sub>g10</sub><sup>−</sup>—absence of 10 nm gold particles associated with presence of HSC 70 epitope. In table bold and red color value is result of statistical analyses of quantification of preferential double-immunogold localization.

| Double-Immunolocalization Parameters                     |                         |                         |            |                                                                            |
|----------------------------------------------------------|-------------------------|-------------------------|------------|----------------------------------------------------------------------------|
| <b>(A) PVY<sup>NTN</sup> inoculated cv Irys 3 dpi:</b>   |                         |                         |            |                                                                            |
| <b>vacuole</b>                                           |                         |                         |            |                                                                            |
| Protein                                                  | Hsc 70 g10 <sup>+</sup> | Hsc 70 g10 <sup>−</sup> | Row totals | Ratio HSC70 <sub>g10</sub> <sup>+</sup> /HSC70 <sub>g10</sub> <sup>−</sup> |
| Nlb g18 <sup>+</sup>                                     | 74                      | 9                       | 83         | 8.22                                                                       |
| Nlb g18 <sup>−</sup>                                     | 4                       | 12                      | 16         | 0.33                                                                       |
| Column totals                                            | 78                      | 21                      | 99         | <b>OR=24.68</b>                                                            |
| <b>nucleus</b>                                           |                         |                         |            |                                                                            |
| Protein                                                  | Hsc 70 g10 <sup>+</sup> | Hsc 70 g10 <sup>−</sup> | Row totals | Ratio HSC70 <sub>g10</sub> <sup>+</sup> /HSC70 <sub>g10</sub> <sup>−</sup> |
| Nlb g18 <sup>+</sup>                                     | 84                      | 5                       | 89         | 16.8                                                                       |
| Nlb g18 <sup>−</sup>                                     | 7                       | 13                      | 20         | 0.54                                                                       |
| Column totals                                            | 91                      | 18                      | 109        | <b>OR=31.2</b>                                                             |
| <b>chloroplast</b>                                       |                         |                         |            |                                                                            |
| Protein                                                  | Hsc 70 g10 <sup>+</sup> | Hsc 70 g10 <sup>−</sup> | Row totals | Ratio HSC70 <sub>g10</sub> <sup>+</sup> /HSC70 <sub>g10</sub> <sup>−</sup> |
| Nlb g18 <sup>+</sup>                                     | 30                      | 5                       | 35         | 6                                                                          |
| Nlb g18 <sup>−</sup>                                     | 2                       | 7                       | 9          | 0.29                                                                       |
| Column totals                                            | 32                      | 12                      | 44         | <b>OR=21</b>                                                               |
| <b>(B) PVY<sup>NTN</sup> inoculated cv Irys 7 dpi</b>    |                         |                         |            |                                                                            |
| <b>vacuole</b>                                           |                         |                         |            |                                                                            |
| Protein                                                  | Hsc 70 g10 <sup>+</sup> | Hsc 70 g10 <sup>−</sup> | Row totals | Ratio HSC70 <sub>g10</sub> <sup>+</sup> /HSC70 <sub>g10</sub> <sup>−</sup> |
| Nlb g18 <sup>+</sup>                                     | 90                      | 3                       | 93         | 30                                                                         |
| Nlb g18 <sup>−</sup>                                     | 3                       | 5                       | 8          | 0.6                                                                        |
| Column totals                                            | 93                      | 8                       | 101        | <b>OR=50</b>                                                               |
| <b>nucleus</b>                                           |                         |                         |            |                                                                            |
| Protein                                                  | Hsc 70 g10 <sup>+</sup> | Hsc 70 g10 <sup>−</sup> | Row totals | Ratio HSC70 <sub>g10</sub> <sup>+</sup> /HSC70 <sub>g10</sub> <sup>−</sup> |
| Nlb g18 <sup>+</sup>                                     | 109                     | 5                       | 114        | 21.8                                                                       |
| Nlb g18 <sup>−</sup>                                     | 6                       | 21                      | 27         | 0.29                                                                       |
| Column totals                                            | 115                     | 26                      | 141        | <b>OR=76.3</b>                                                             |
| <b>chloroplast</b>                                       |                         |                         |            |                                                                            |
| Protein                                                  | Hsc 70 g10 <sup>+</sup> | Hsc 70 g10 <sup>−</sup> | Row totals | Ratio HSC70 <sub>g10</sub> <sup>+</sup> /HSC70 <sub>g10</sub> <sup>−</sup> |
| Nlb g18 <sup>+</sup>                                     | 81                      | 5                       | 86         | 16.2                                                                       |
| Nlb g18 <sup>−</sup>                                     | 3                       | 7                       | 10         | 0.44                                                                       |
| Column totals                                            | 84                      | 12                      | 96         | <b>OR=37.8</b>                                                             |
| <b>(C) PVY<sup>NTN</sup> inoculated cv Sekwana 3 dpi</b> |                         |                         |            |                                                                            |
| <b>vacuole</b>                                           |                         |                         |            |                                                                            |
| Protein                                                  | Hsc 70 g10 <sup>+</sup> | Hsc 70 g10 <sup>−</sup> | Row totals | Ratio HSC70 <sub>g10</sub> <sup>+</sup> /HSC70 <sub>g10</sub> <sup>−</sup> |
| Nlb g18 <sup>+</sup>                                     | 60                      | 14                      | 74         | 4.29                                                                       |
| Nlb g18 <sup>−</sup>                                     | 3                       | 9                       | 12         | 0.33                                                                       |
| Column totals                                            | 63                      | 23                      | 86         | <b>OR=12.86</b>                                                            |
| <b>nucleus</b>                                           |                         |                         |            |                                                                            |
| Protein                                                  | Hsc 70 g10 <sup>+</sup> | Hsc 70 g10 <sup>−</sup> | Row totals | Ratio HSC70 <sub>g10</sub> <sup>+</sup> /HSC70 <sub>g10</sub> <sup>−</sup> |
| Nlb g18 <sup>+</sup>                                     | 85                      | 10                      | 95         | 8.5                                                                        |
| Nlb g18 <sup>−</sup>                                     | 6                       | 13                      | 19         | 0.46                                                                       |
| Column totals                                            | 91                      | 23                      | 114        | <b>OR=18.42</b>                                                            |
| <b>chloroplast</b>                                       |                         |                         |            |                                                                            |
| Protein                                                  | Hsc 70 g10 <sup>+</sup> | Hsc 70 g10 <sup>−</sup> | Row totals | Ratio HSC70 <sub>g10</sub> <sup>+</sup> /HSC70 <sub>g10</sub> <sup>−</sup> |
| Nlb g18 <sup>+</sup>                                     | 40                      | 5                       | 45         | 8                                                                          |
| Nlb g18 <sup>−</sup>                                     | 3                       | 4                       | 7          | 0.75                                                                       |
| Column totals                                            | 43                      | 9                       | 52         | <b>OR=10.67</b>                                                            |
| <b>(D) PVY<sup>NTN</sup> inoculated cv Sekwana 7 dpi</b> |                         |                         |            |                                                                            |
| <b>vacuole</b>                                           |                         |                         |            |                                                                            |
| Protein                                                  | Hsc 70 g10 <sup>+</sup> | Hsc 70 g10 <sup>−</sup> | Row totals | Ratio HSC70 <sub>g10</sub> <sup>+</sup> /HSC70 <sub>g10</sub> <sup>−</sup> |
| Nlb g18 <sup>+</sup>                                     | 36                      | 10                      | 46         | 3.6                                                                        |
| Nlb g18 <sup>−</sup>                                     | 6                       | 10                      | 16         | 0.6                                                                        |
| Column totals                                            | 42                      | 20                      | 62         | <b>OR=6</b>                                                                |
| <b>nucleus</b>                                           |                         |                         |            |                                                                            |
| Protein                                                  | Hsc 70 g10 <sup>+</sup> | Hsc 70 g10 <sup>−</sup> | Row totals | Ratio HSC70 <sub>g10</sub> <sup>+</sup> /HSC70 <sub>g10</sub> <sup>−</sup> |
| Nlb g18 <sup>+</sup>                                     | 38                      | 9                       | 47         | 4.22                                                                       |
| Nlb g18 <sup>−</sup>                                     | 6                       | 11                      | 17         | 0.55                                                                       |
| Column totals                                            | 44                      | 20                      | 64         | <b>OR=7.74</b>                                                             |

| chloroplast          |                         |                         |            |                                                                          |
|----------------------|-------------------------|-------------------------|------------|--------------------------------------------------------------------------|
| Protein              | Hsc 70 g10 <sup>+</sup> | Hsc 70 g10 <sup>-</sup> | Row totals | Ratio HSC70 <sub>g10<sup>+</sup></sub> /HSC70 <sub>g10<sup>-</sup></sub> |
| Nlb g18 <sup>+</sup> | 13                      | 5                       | 18         | 2.6                                                                      |
| Nlb g18 <sup>-</sup> | 3                       | 5                       | 8          | 0.6                                                                      |
| Column totals        | 16                      | 10                      | 26         | <b>OR=4.33</b>                                                           |
